# Supplementary material
Source: Research Square preprint supplement (doi:10.21203/rs.3.rs-9756539/v1)
Supplement: Supplementary file 1 [file 6b258b82ed9d55c8eff85b7d.docx]

**Table S1** Primers used for amplifying the genome sequences of StFV2

| Primer name | Sequences (5′-3′) | Products |
| --- | --- | --- |
| 5′RACE R1 | CCGACCTCCTTTATGAGTGCCATC | 5′-terminal |
| 5′RACE R2 | GCCGGGAAGAAGATTATCATGGAC |
| 3′RACE F1 | TAAAGGACCCTCTGGATGAAAGCC | 3′-terminal |
| 3′RACE F2 | CTGGTTTCACACCCAGTTCGACTC |
| 1F | TCTTTATGGTGCTTGTTGCCTTCTC | 201-1192 |
| 1R | CTCTAGTTCGTTGACATCTGAACGG |
| 2F | TACAGACCCTTCAAGGTTTGGAAGT | 1009-2102 |
| 2R | ACTTGGCCATGGCCGATTGTATGGA |
| 3F | TATTGATATAAACTATAAGCAAGTG | 1825-2977 |
| 3R | ATCCAATTGCAACTTGCAATTTAAT |
| 4F | AACATGATTGATGAAGTGCAAGAAC | 2522-3606 |
| 4R | TCTGCTGACAACTCTGACATATTAG |
| 5F | GGTCATTGATTCTAAATGCCACAGG | 3538-4888 |
| 5R | CTTTGAGATGACAAGAGAAGATTGC |
| 6F | ATGTCTTCTCCGTCTAGGAAAGAGT | 4691-5872 |
| 6R | CAGACCATGGTCTGTCAAGTCTTTC |
| 7F | TCACTGCTCCTTCAAGAAAAGCTTT | 5676-6576 |
| 7R | TATAATCCCCTGAATAAATCAAAAT |

**Table S2** Sequence identities of the genome and the amino acid sequences of ORF1 and ORF2 between StFV2 and other members of the family Fusariviridae

| **Virus name** | **Accession number** | | **Genome(%)** | **ORF1(%)** | **ORF2(%)** |
| --- | --- | --- | --- | --- | --- |
| Rutstroemia firma fusarivirus 1 | | MW 489563.1 | 44.94 | 34.86 | 12.8 |
| Botrytis cinerea fusarivirus 5 | | NC 076820.1 | 43.82 | 33.35 | 12.28 |
| Macrophomina phaseolina single-stranded RNA virus 1 | | NC 030868.1 | 43.28 | 34.25 | 11.56 |
| Botryosphaeria dothidea fusarivirus 1 | | NC 076665.1 | 43.78 | 32.9 | 9.44 |
| Aspergillus ellipticus fusarivirus 1 | | NC 024485.1 | 42.83 | 29.59 | 12.91 |
| Zymoseptoria tritici fusarivirus 1 | | NC 076666.1 | 41.08 | 30.59 | 10.4 |
| Plasmopara viticola lesion associated fusarivirus 2 | | NC 006937.2 | 42.90 | 30.45 | 9.85 |
| Penicillium roqueforti ssRNA mycovirus 1 | | PV 443069.1 | 43.31 | 37.17 | 14.97 |
| Fusarium graminearum dsRNA mycovirus-1 | | NC 076823.1 | 44.65 | 34.08 | 12.55 |
| Setosphaeria turcica fusarivirus 1 | | NC 024699.1 | 60.86 | 69.12 | 54.21 |
| Plasmopara viticola lesion associated fusarivirus 1 | | NC 076583.1 | 61.02 | 66.3 | 53.02 |
| Rosellinia necatrix fusarivirus 1 | | MN 551105.1 | 46.47 | 43.26 | 21.62 |
| Neurospora discreta fusarivirus 1 | | NC 076664.1 | 47.59 | 44.68 | 15.06 |
| Fusarium poae fusarivirus 1 | | NC 076668.1 | 47.99 | 43.46 | 18.11 |
| Sclerotium rolfsii fusarivirus 2 | | NC 076640.1 | 40.83 | 27.12 | 11.4 |
| Sclerotium rolfsii fusarivirus 1 | | NC 076639.1 | 40.72 | 27.45 | 9.79 |
| Rhizoctonia solani fusarivirus 3 | | NC 076667.1 | 36.55 | 24.92 | — |
| Rhizoctonia solani fusarivirus 2 | | NC 076612.1 | 26.36 | 24.16 | 4.04 |
| Rhizoctonia solani fusarivirus 1 | | PQ 328750.1 | 25.87 | 21.45 | — |
| Botrytis cinerea fusarivirus 4 | | NC 076609.1 | 34.22 | 22.19 | 6.64 |
| Botrytis cinerea fusarivirus 3 | | NC 076860.1 | 33.88 | 21.87 | 8.5 |
| Neurospora discreta fusarivirus 2 | | NC 076851.1 | 39.36 | 24.19 | 8.58 |
| Neurospora crassa fusarivirus 1 | | NC 076690.1 | 38.33 | 23.84 | 8.73 |
| Sclerotinia homoeocarpa fusarivirus 1 | | NC 076849.1 | 39.55 | 24.21 | 10.53 |
| Sclerotinia sclerotiorum fusarivirus 1 | | NC 076848.1 | 38.37 | 24.55 | 7.6 |
| Botrytis cinerea fusarivirus 7 | | NC 076688.1 | 36.92 | 24.28 | 7.99 |
| Lentinula edodes fusarivirus 1 | | NC 076689.1 | 38.30 | 17.93 | — |
